# Supplementary material for: Improvements in low-level radionuclide measurement capability through use of the Apex Q sample introduction system combined with ICP-MS/MS
Source: Royal Society of Chemistry journal article supplement (doi:10.1039/d4ja00216d), 2024-01-01

Supplementary Information

Samarium/Europium instrument tuning

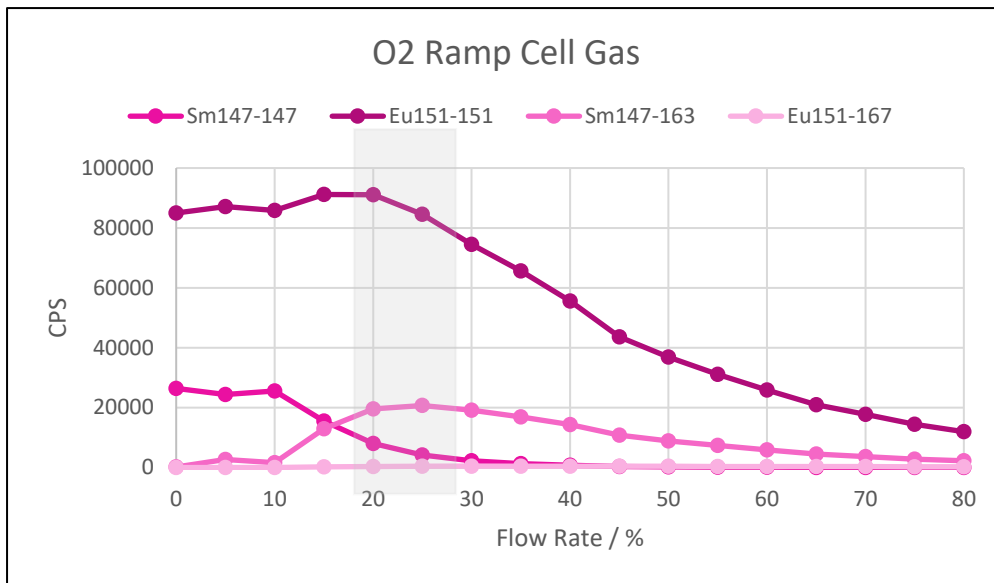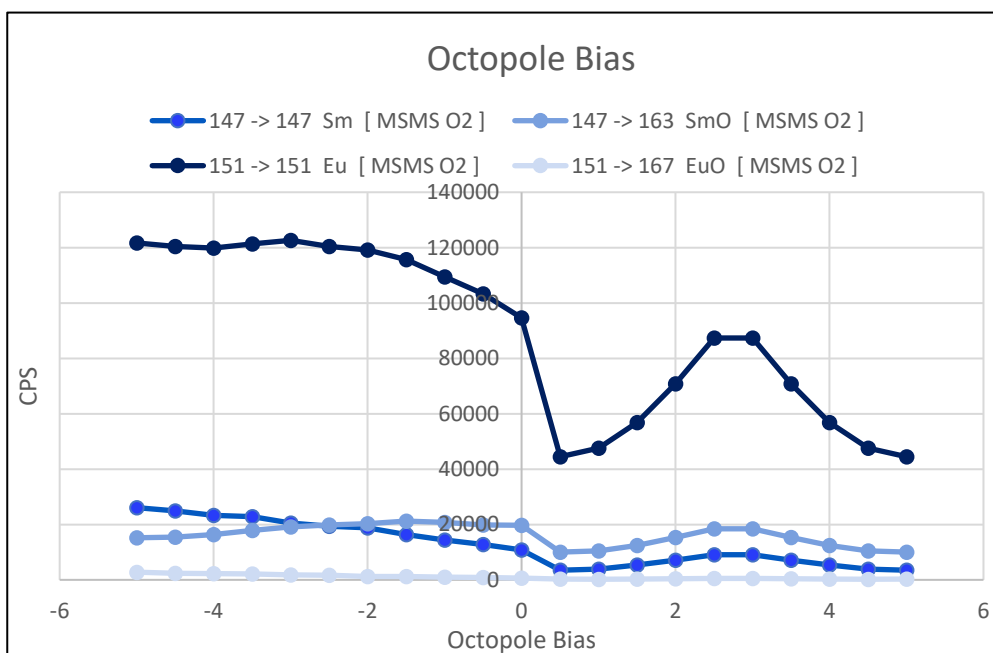

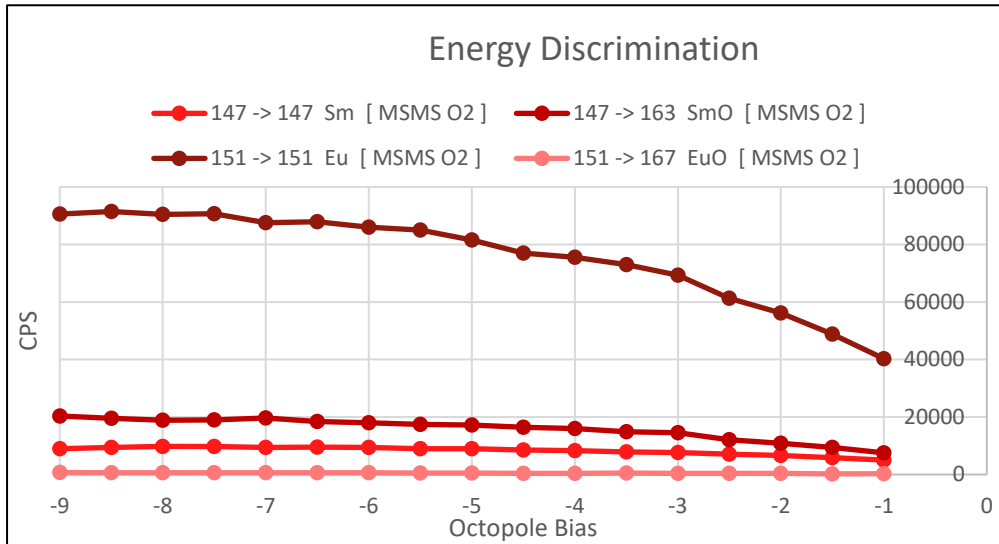

### Strontium/zirconium instrument tuning

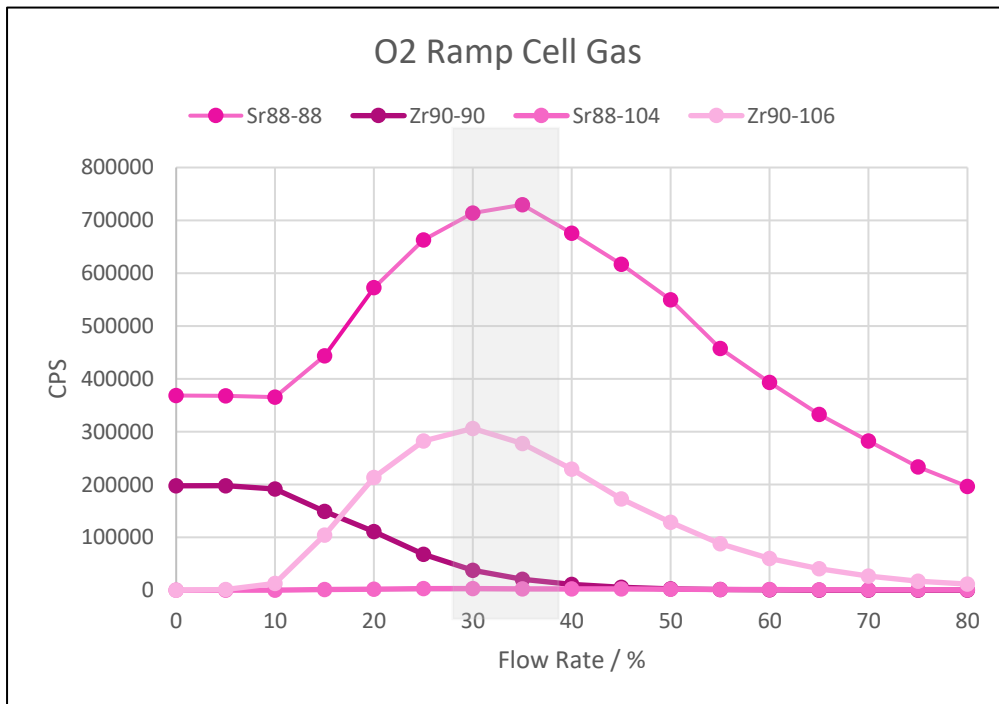

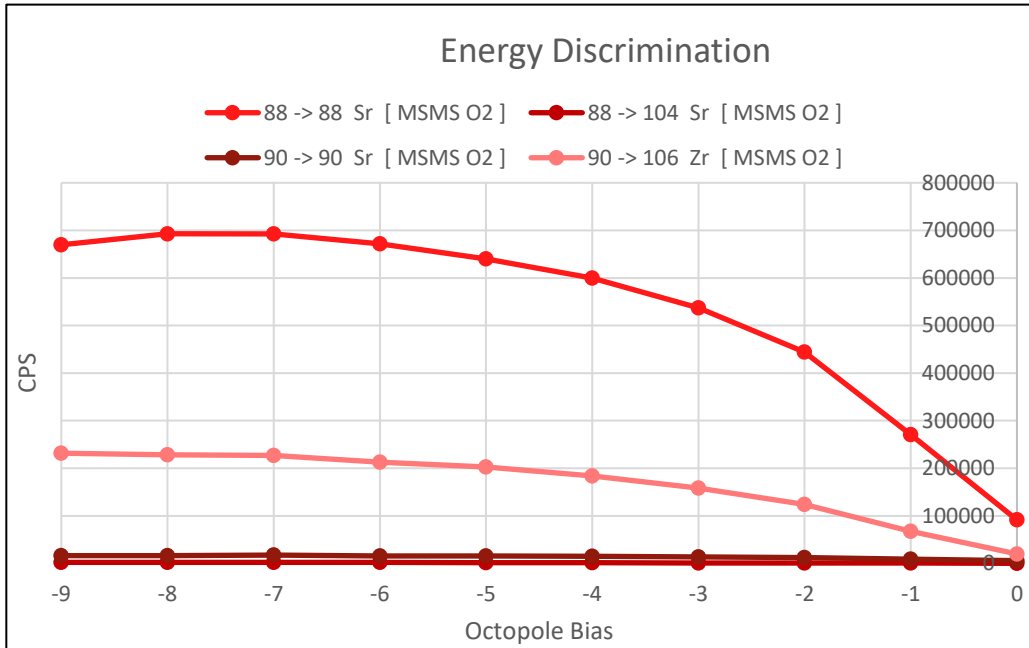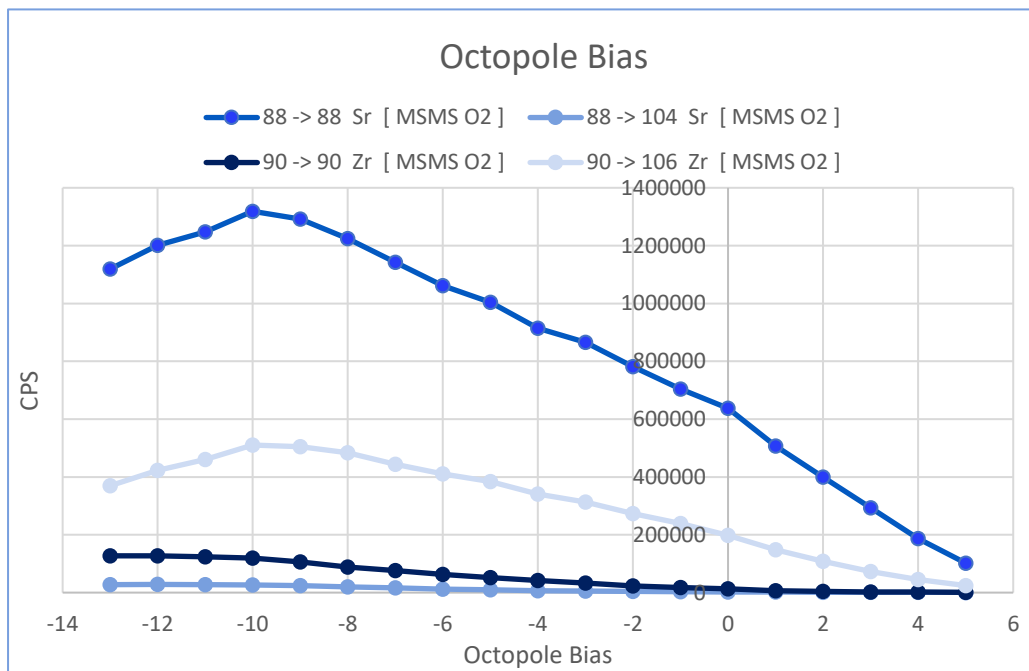

# Actinides- Apex and standard sample introduction

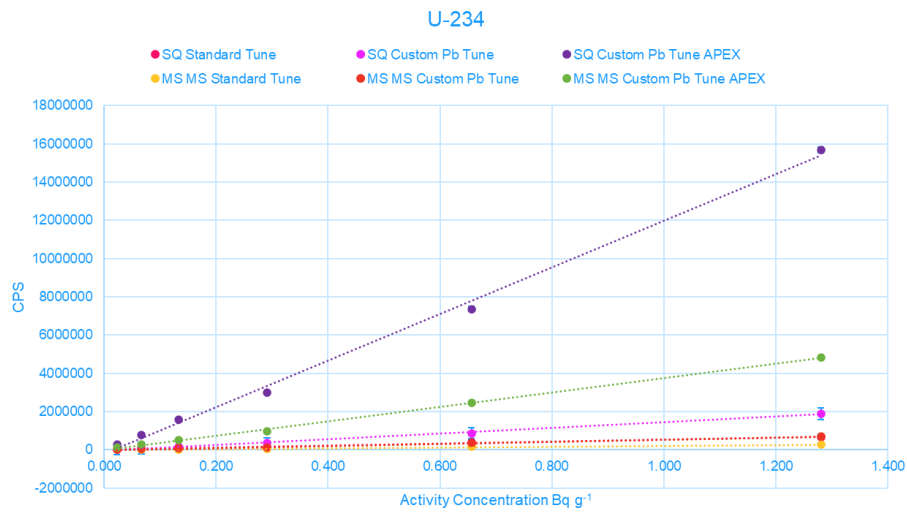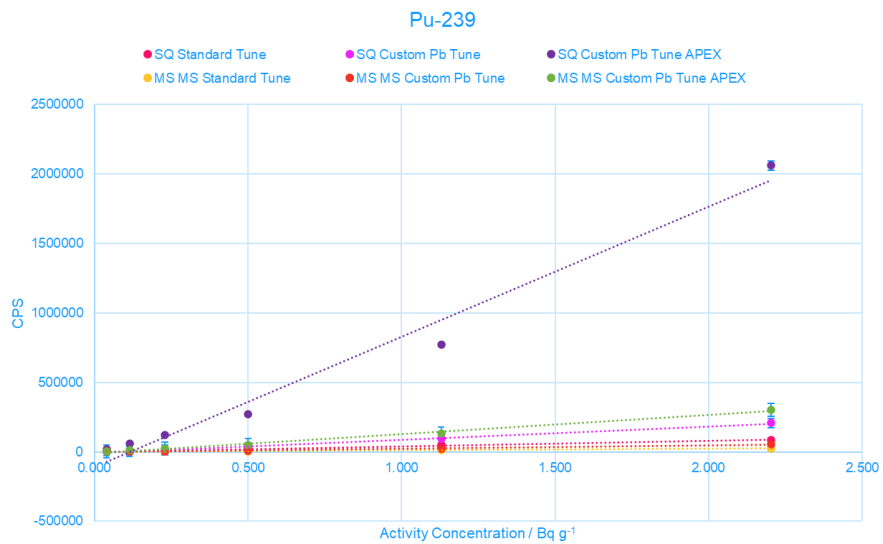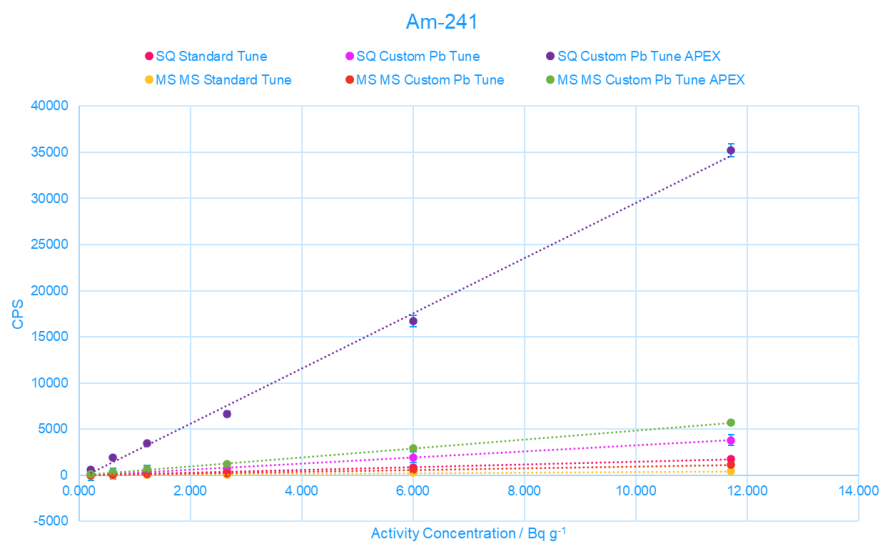

Lead- Apex and standard sample introduction

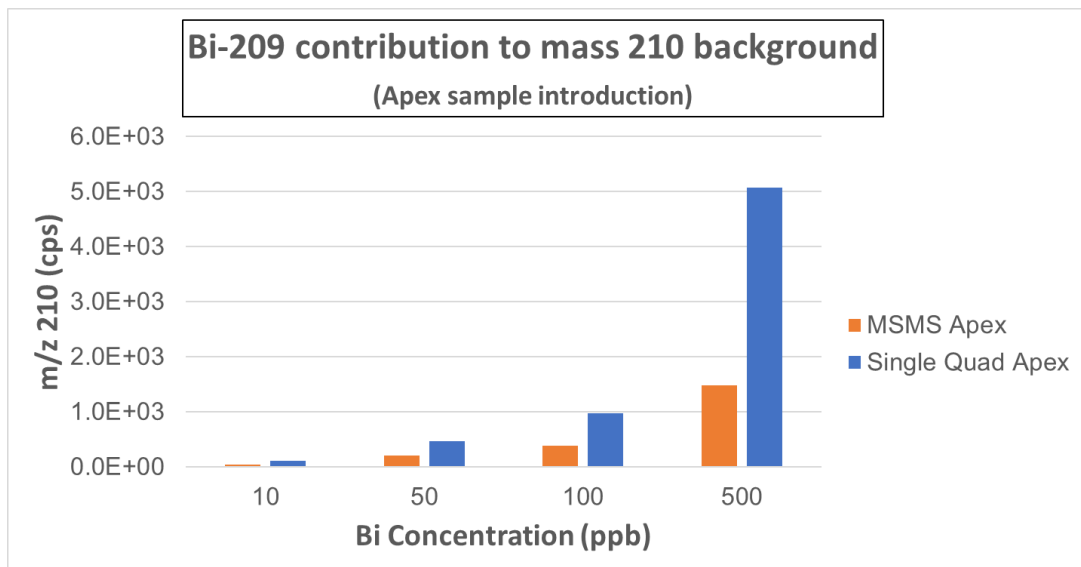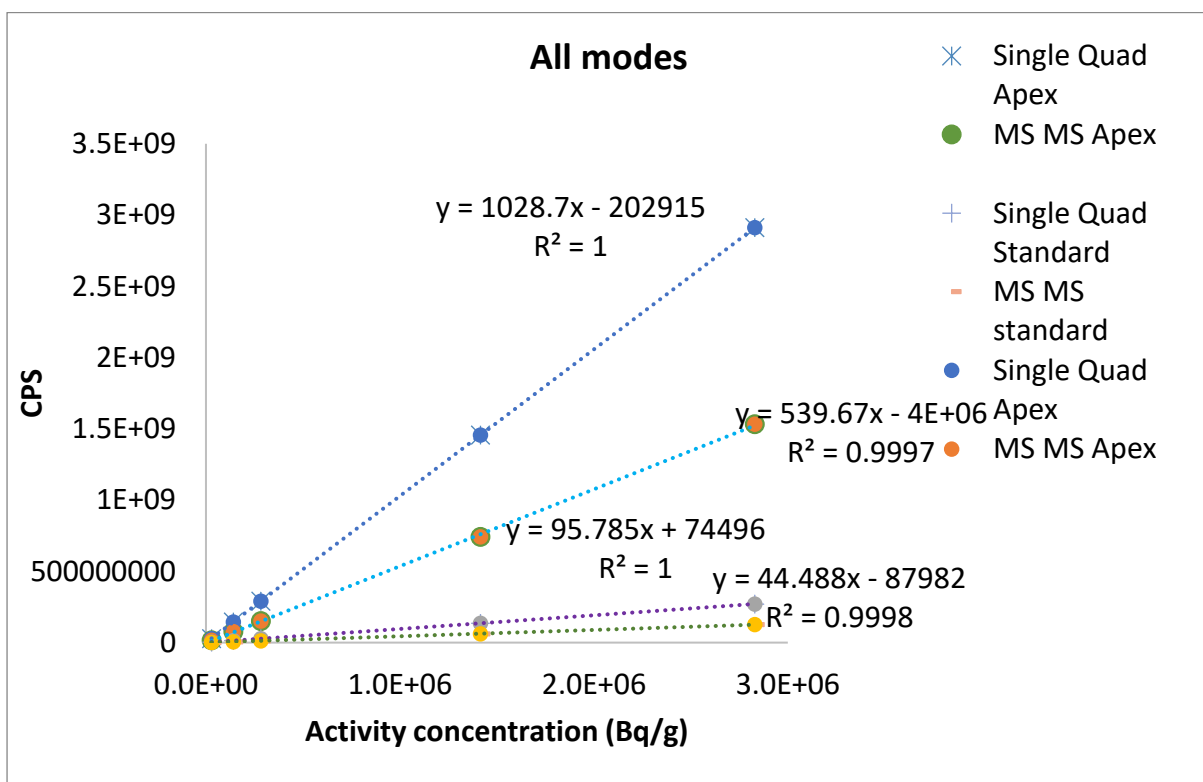

Supplement: d4ja00216d1.pdf [file d4ja00216d1.pdf]
